# Supplementary material
Source: HighWire-hosted journal article supplement (https://heart.bmj.com/content/heartjnl-2019-316091)
Supplement: inline-supplementary-material-1 [file inline-supplementary-material-1.pdf]

**Supplementary file**

**Supplementary table 1**

List of Read codes used to define ischaemic heart disease

| <b>Read code</b> | <b>Description</b>                                          |
|------------------|-------------------------------------------------------------|
| G30y100          | Acute papillary muscle infarction                           |
| G306.00          | True posterior myocardial infarction                        |
| G350.00          | Subsequent myocardial infarction of anterior wall           |
| G33z400          | Ischaemic chest pain                                        |
| G34y000          | Chronic coronary insufficiency                              |
| G312.00          | Coronary thrombosis not resulting in myocardial infarction  |
| G341.00          | Aneurysm of heart                                           |
| G32..00          | Old myocardial infarction                                   |
| G30X000          | Acute ST segment elevation myocardial infarction            |
| G30A.00          | Mural thrombosis                                            |
| G364.00          | Ruptur chordae tendinae/curr comp fol acute myocard infarct |
| G309.00          | Acute Q-wave infarct                                        |
| Gyu3600          | [X]Subsequent myocardial infarction of unspecified site     |
| G341200          | Aneurysm of coronary vessels                                |
| Gyu3200          | [X]Other forms of acute ischaemic heart disease             |
| G311500          | Acute coronary syndrome                                     |
| G311z00          | Preinfarction syndrome NOS                                  |
| G330.00          | Angina decubitus                                            |
| G382.00          | Postoperative transmural myocardial infarction other sites  |
| G34z.00          | Other chronic ischaemic heart disease NOS                   |
| G311100          | Unstable angina                                             |
| G341.11          | Cardiac aneurysm                                            |
| G31y.00          | Other acute and subacute ischaemic heart disease            |
| G344.00          | Silent myocardial ischaemia                                 |
| G31y200          | Subendocardial ischaemia                                    |
| G33z000          | Status anginosus                                            |
| G34y100          | Chronic myocardial ischaemia                                |
| G361.00          | Atrial septal defect/curr comp folow acut myocardal infarct |
| G39..00          | Coronary microvascular disease                              |
| G340000          | Single coronary vessel disease                              |
| G34yz00          | Other specified chronic ischaemic heart disease NOS         |
| G30..00          | Acute myocardial infarction                                 |
| G304.00          | Posterior myocardial infarction NOS                         |
| G3z..00          | Ischaemic heart disease NOS                                 |
| G30y000          | Acute atrial infarction                                     |
| G310.00          | Postmyocardial infarction syndrome                          |
| G33z500          | Post infarct angina                                         |
| G35X.00          | Subsequent myocardial infarction of unspecified site        |
| G33zz00          | Angina pectoris NOS                                         |
| G311011          | MI - myocardial infarction aborted                          |

|         |                                                              |
|---------|--------------------------------------------------------------|
| G30..17 | Silent myocardial infarction                                 |
| G366.00 | Thrombosis atrium,auric append&vent/curr comp foll acute MI  |
| G30..16 | Thrombosis - coronary                                        |
| G340.11 | Triple vessel disease of the heart                           |
| G30..15 | MI - acute myocardial infarction                             |
| G340.12 | Coronary artery disease                                      |
| G343.00 | Ischaemic cardiomyopathy                                     |
| G36..00 | Certain current complication follow acute myocardial infarct |
| G30..14 | Heart attack                                                 |
| G30..13 | Cardiac rupture following myocardial infarction (MI)         |
| G301.00 | Other specified anterior myocardial infarction               |
| G30..12 | Coronary thrombosis                                          |
| Gyu3300 | [X]Other forms of chronic ischaemic heart disease            |
| G30..11 | Attack - heart                                               |
| G341300 | Acquired atrioventricular fistula of heart                   |
| G311400 | Worsening angina                                             |
| Gyu3.00 | [X]Ischaemic heart diseases                                  |
| G307.00 | Acute subendocardial infarction                              |
| G332.00 | Coronary artery spasm                                        |
| G30z.00 | Acute myocardial infarction NOS                              |
| G380.00 | Postoperative transmural myocardial infarction anterior wall |
| G311000 | Myocardial infarction aborted                                |
| G32..12 | Personal history of myocardial infarction                    |
| G32..11 | Healed myocardial infarction                                 |
| G31y300 | Transient myocardial ischaemia                               |
| G33z100 | Stenocardia                                                  |
| G363.00 | Ruptur cardiac wall w'out haemopericard/cur comp fol ac MI   |
| G30yz00 | Other acute myocardial infarction NOS                        |
| G34..00 | Other chronic ischaemic heart disease                        |
| G340100 | Double coronary vessel disease                               |
| G331.00 | Prinzmetal's angina                                          |
| G383.00 | Postoperative transmural myocardial infarction unspec site   |
| G31yz00 | Other acute and subacute ischaemic heart disease NOS         |
| G33z600 | New onset angina                                             |
| G34y.00 | Other specified chronic ischaemic heart disease              |
| G31..00 | Other acute and subacute ischaemic heart disease             |
| G341000 | Ventricular cardiac aneurysm                                 |
| G301z00 | Anterior myocardial infarction NOS                           |
| G30X.00 | Acute transmural myocardial infarction of unspecif site      |
| G301100 | Acute anteroseptal infarction                                |
| G360.00 | Haemopericardium/current comp folow acut myocard infarct     |
| Gyu3400 | [X]Acute transmural myocardial infarction of unspecif site   |
| Gyu3000 | [X]Other forms of angina pectoris                            |
| G38..00 | Postoperative myocardial infarction                          |

|         |                                                              |
|---------|--------------------------------------------------------------|
| G307100 | Acute non-ST segment elevation myocardial infarction         |
| G330000 | Nocturnal angina                                             |
| G305.00 | Lateral myocardial infarction NOS                            |
| G331.11 | Variant angina pectoris                                      |
| G351.00 | Subsequent myocardial infarction of inferior wall            |
| G34z000 | Asymptomatic coronary heart disease                          |
| G310.11 | Dressler's syndrome                                          |
| G311300 | Refractory angina                                            |
| G365.00 | Rupture papillary muscle/curr comp fol acute myocard infarct |
| G340.00 | Coronary atherosclerosis                                     |
| G33z.00 | Angina pectoris NOS                                          |
| G30B.00 | Acute posterolateral myocardial infarction                   |
| G31y000 | Acute coronary insufficiency                                 |
| G33z200 | Syncope anginosa                                             |
| G3...13 | IHD - Ischaemic heart disease                                |
| G3...12 | Atherosclerotic heart disease                                |
| G3...11 | Arteriosclerotic heart disease                               |
| G302.00 | Acute inferolateral infarction                               |
| G30y200 | Acute septal infarction                                      |
| G30y.00 | Other acute myocardial infarction                            |
| G381.00 | Postoperative transmural myocardial infarction inferior wall |
| G341z00 | Aneurysm of heart NOS                                        |
| G311.12 | Impending infarction                                         |
| G33z300 | Angina on effort                                             |
| G311.11 | Crescendo angina                                             |
| G35..00 | Subsequent myocardial infarction                             |
| G33z700 | Stable angina                                                |
| G3y..00 | Other specified ischaemic heart disease                      |
| G311.14 | Angina at rest                                               |
| G38z.00 | Postoperative myocardial infarction, unspecified             |
| G311.13 | Unstable angina                                              |
| G37..00 | Cardiac syndrome X                                           |
| G362.00 | Ventric septal defect/curr comp fol acut myocardal infarctn  |
| Gyu3500 | [X]Subsequent myocardial infarction of other sites           |
| G3...00 | Ischaemic heart disease                                      |
| G341100 | Other cardiac wall aneurysm                                  |
| G301000 | Acute anteroapical infarction                                |
| G353.00 | Subsequent myocardial infarction of other sites              |
| G303.00 | Acute inferoposterior infarction                             |
| G307000 | Acute non-Q wave infarction                                  |
| G33..00 | Angina pectoris                                              |
| G311.00 | Preinfarction syndrome                                       |
| G384.00 | Postoperative subendocardial myocardial infarction           |
| G311200 | Angina at rest                                               |

---

|         |                                        |
|---------|----------------------------------------|
| G342.00 | Atherosclerotic cardiovascular disease |
| G31y100 | Microinfarction of heart               |
| G330z00 | Angina decubitus NOS                   |
| G308.00 | Inferior myocardial infarction NOS     |
| G341111 | Mural cardiac aneurysm                 |
| G300.00 | Acute anterolateral infarction         |

---

## Supplementary text 1

### Latent class analysis

Latent class analysis is a statistical method for finding unobservable, or latent, subgroups within a population based on the similarity of patterns across multivariate categorical data (in this case comorbidities). This method was chosen over counts-based approaches (whether weighted or unweighted) as those methods are not able to distinguish between groups with the same number but different types of comorbidities. Furthermore, count-based measures have been shown to have poor predictability of outcomes such as emergency admissions (Wallace *et al*, 2016). It was also chosen over combinations of comorbidities given the very large number of groupings generated for all pair-wise combinations of 20 comorbidities, which would greatly inflate the risk of a type II error. Latent class analysis was preferred over other traditional clustering methods, as it is a model-based clustering approach that derives clusters using a probabilistic model that describes the distribution of the data as opposed to determining clusters based on a chosen distance measure. In latent class analysis, posterior probabilities are assigned to each individual based on the estimated model parameters and their observed scores. This allows for each individual to be allocated to the appropriate latent class based on their probability of membership and from this, the risk of mortality by cluster can be estimated (Hagenaars and McCutcheon, 2002)

As recommended by Busija *et al* (2019), there were 20 chronic conditions selected as comorbidities and these conditions all met the criteria from the Academy of Medical Sciences and the WHO in that they were either:

1. A physical non-communicable disease of long duration such as cardiovascular disease or cancer;
2. A mental health condition of long duration such as a mood disorder or dementia.

Latent class analysis was undertaken using generalised structural equation modelling in Stata. Models with class (cluster) size of 2-8 were run. The optimal number of clusters in the underlying data was selected based on a number of criteria:

1. Information criteria: while the eight cluster solution was preferred in all criteria of AIC, BIC, SSABIC, and log-likelihood, there was not a lot of added benefit for these criteria above the three cluster solution apart from entropy where a five cluster solution was preferred (**Supplementary table 2**).

2. No small classes: the rule of thumb is that there is no cluster size below 5% of the study population. With six or more clusters, at least two of the clusters were 5% or below. The choice of five clusters meant that there was only one cluster that made up 3.1% of the population.
3. Domain-usefulness: In terms of clinical interpretability and meaningfulness, the five clusters are quite distinct and clinically interpretable with all patients in the smaller cluster having a diagnosis of COPD and two-thirds also having a diagnosis of asthma.

## References

- Busija L, Lim K, Szoeki C, Sanders KM, McCabe MP (2019). Do replicable profiles of multimorbidity exist? Systematic review and synthesis. *Eur J Epidemiol in press*.
- Hagenaars JA, and McCutcheon A L. (2002). *Applied Latent Class Analysis*. Cambridge: Cambridge University Press
- Wallace E, McDowell R, Bennett K, Fahey T, Smith SM (2016). Comparison of count-based multimorbidity measures in predicting emergency admission and functional decline in older community-dwelling adults: a prospective cohort study. *BMJ Open* 6:e013089.

**Supplementary table 2**

Latent class model fit statistics

| Model          | Obs    | Log likelihood | df  | AIC     | BIC     | SSABIC  | Entropy |
|----------------|--------|----------------|-----|---------|---------|---------|---------|
| Two clusters   | 92,186 | -551219        | 41  | 1102521 | 1102907 | 1102777 | 0.463   |
| Three clusters | 92,186 | -544058        | 62  | 1088240 | 1088825 | 1088628 | 0.591   |
| Four clusters  | 92,186 | -542877        | 83  | 1085920 | 1086703 | 1086439 | 0.547   |
| Five clusters  | 92,186 | -541924        | 104 | 1084056 | 1085037 | 1084706 | 0.603   |
| Six clusters   | 92,186 | -541050        | 125 | 1082350 | 1083529 | 1083132 | 0.589   |
| Seven clusters | 92,186 | -540491        | 146 | 1081274 | 1082651 | 1082187 | 0.581   |
| Eight clusters | 92,186 | -540268        | 167 | 1080871 | 1082446 | 1081915 | 0.588   |

AIC, Akaike Information Criterion; BIC, Bayesian information criterion; SSABIC, sample size adjusted BIC



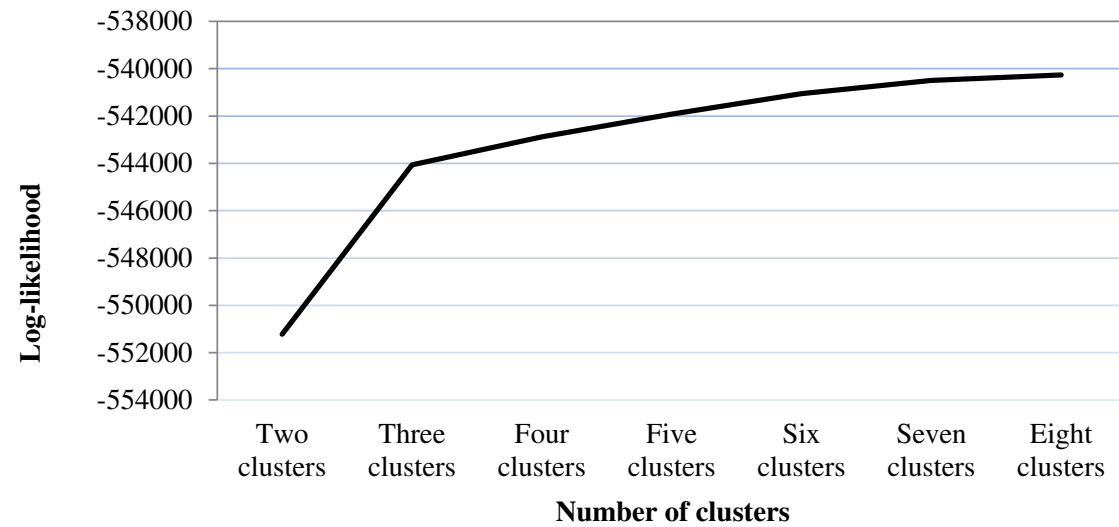**Supplementary figure 1**

Plot of the log likelihood for the different latent class solutions

**Supplementary table 3**

Median (IQR) probability of group membership

|                                         | <b>Median (IQR)</b> |
|-----------------------------------------|---------------------|
| Low-burden                              | 0.85 (0.57-0.96)    |
| Cardio-metabolic                        | 0.63 (0.53-0.71)    |
| Mental health                           | 0.89 (0.70-0.95)    |
| High-burden musculoskeletal vascular    | 0.71 (0.54-0.87)    |
| High-burden musculoskeletal respiratory | 0.69 (0.50-0.83)    |

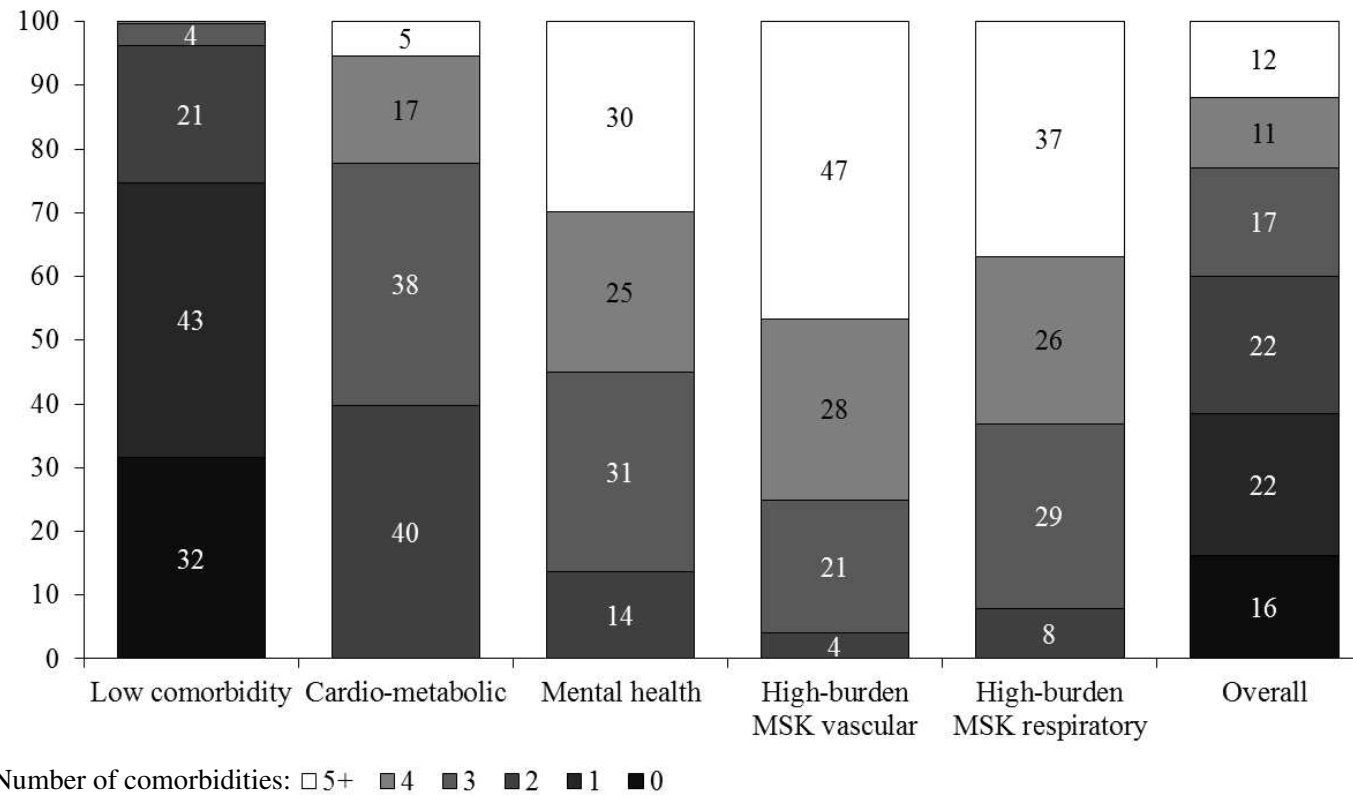

### Supplementary figure 2

Distribution (%) of the number of comorbidities in patients with ischaemic heart disease according to comorbidity phenotype

**Supplementary table 4**

Distribution of the 20 comorbidities according to the five comorbidity clusters\*

|                       | <b>Low-burden</b> | <b>Cardio-metabolic</b> | <b>Mental health</b> | <b>High-burden<br/>musculoskeletal<br/>vascular</b> | <b>High-burden<br/>musculoskeletal<br/>respiratory</b> |
|-----------------------|-------------------|-------------------------|----------------------|-----------------------------------------------------|--------------------------------------------------------|
| Atrial fibrillation   | 1,146 (2.4%)      | 720 (3.8%)              | 455 (4.1%)           | 5,432 (45.1%)                                       | 362 (12.7%)                                            |
| Heart failure         | 1,149 (2.4%)      | 84 (0.5%)               | 355 (3.2%)           | 4,395 (36.5%)                                       | 396 (13.8%)                                            |
| Hypertension          | 10,222 (21.6%)    | 18,303 (97.0%)          | 5,166 (47.0%)        | 8,432 (70.0%)                                       | 1,290 (45.1%)                                          |
| Stroke & TIA          | 778 (1.6%)        | 2,123 (11.3%)           | 1,000 (9.1%)         | 3,541 (29.4%)                                       | 329 (11.5%)                                            |
| PVD                   | 592 (1.3%)        | 1,499 (7.9%)            | 478 (4.4%)           | 1,341 (11.1%)                                       | 456 (15.9%)                                            |
| Kidney disease        | 2,422 (5.1%)      | 6,661 (35.3%)           | 1,668 (15.2%)        | 7,632 (63.3%)                                       | 570 (19.9%)                                            |
| Diabetes              | 2,453 (5.2%)      | 7,280 (38.6%)           | 1,758 (16.0%)        | 2,692 (22.3%)                                       | 325 (11.4%)                                            |
| Hypothyroidism        | 1,568 (3.3%)      | 1,916 (10.2%)           | 1,487 (13.5%)        | 2,011 (16.7%)                                       | 185 (6.5%)                                             |
| Osteoarthritis        | 4,214 (8.9%)      | 1,641 (8.7%)            | 2,067 (18.8%)        | 3,787 (31.4%)                                       | 752 (26.3%)                                            |
| Osteoporosis          | 5,748 (12.1%)     | 6,585 (34.9%)           | 3,701 (33.7%)        | 5,430 (45.1%)                                       | 914 (31.9%)                                            |
| Rheumatoid arthritis  | 442 (0.9%)        | 410 (2.2%)              | 285 (2.6%)           | 547 (4.5%)                                          | 150 (5.2%)                                             |
| Dementia              | 163 (0.3%)        | 12 (0.1%)               | 105 (1.0%)           | 905 (7.5%)                                          | 21 (0.7%)                                              |
| Epilepsy              | 728 (1.5%)        | 93 (0.5%)               | 377 (3.4%)           | 386 (3.2%)                                          | 66 (2.3%)                                              |
| Cancer                | 1,997 (4.2%)      | 2,055 (10.9%)           | 669 (6.1%)           | 2,170 (18.0%)                                       | 374 (13.1%)                                            |
| Asthma                | 3,158 (6.7%)      | 1,630 (8.6%)            | 1,938 (17.6%)        | 1,086 (9.0%)                                        | 1,769 (61.8%)                                          |
| COPD                  | 1,386 (2.9%)      | 492 (2.6%)              | 909 (8.3%)           | 1,070 (8.9%)                                        | 2,862 (100.0%)                                         |
| Anxiety               | 3,371 (7.1%)      | 1,272 (6.7%)            | 8,822 (80.3%)        | 1,356 (11.3%)                                       | 525 (18.3%)                                            |
| Depression            | 3,913 (8.3%)      | 1,079 (5.7%)            | 10,492 (95.5%)       | 1,843 (15.3%)                                       | 612 (21.4%)                                            |
| Severe mental illness | 226 (0.5%)        | 25 (0.1%)               | 829 (7.6%)           | 172 (1.4%)                                          | 38 (1.3%)                                              |
| Chronic liver disease | 260 (0.6%)        | 346 (1.8%)              | 271 (2.5%)           | 90 (0.8%)                                           | 66 (2.3%)                                              |

COPD, chronic obstructive pulmonary disease; PVD, peripheral vascular disease; TIA, transient ischaemic attack.

\*Values are presented as *n* (%)

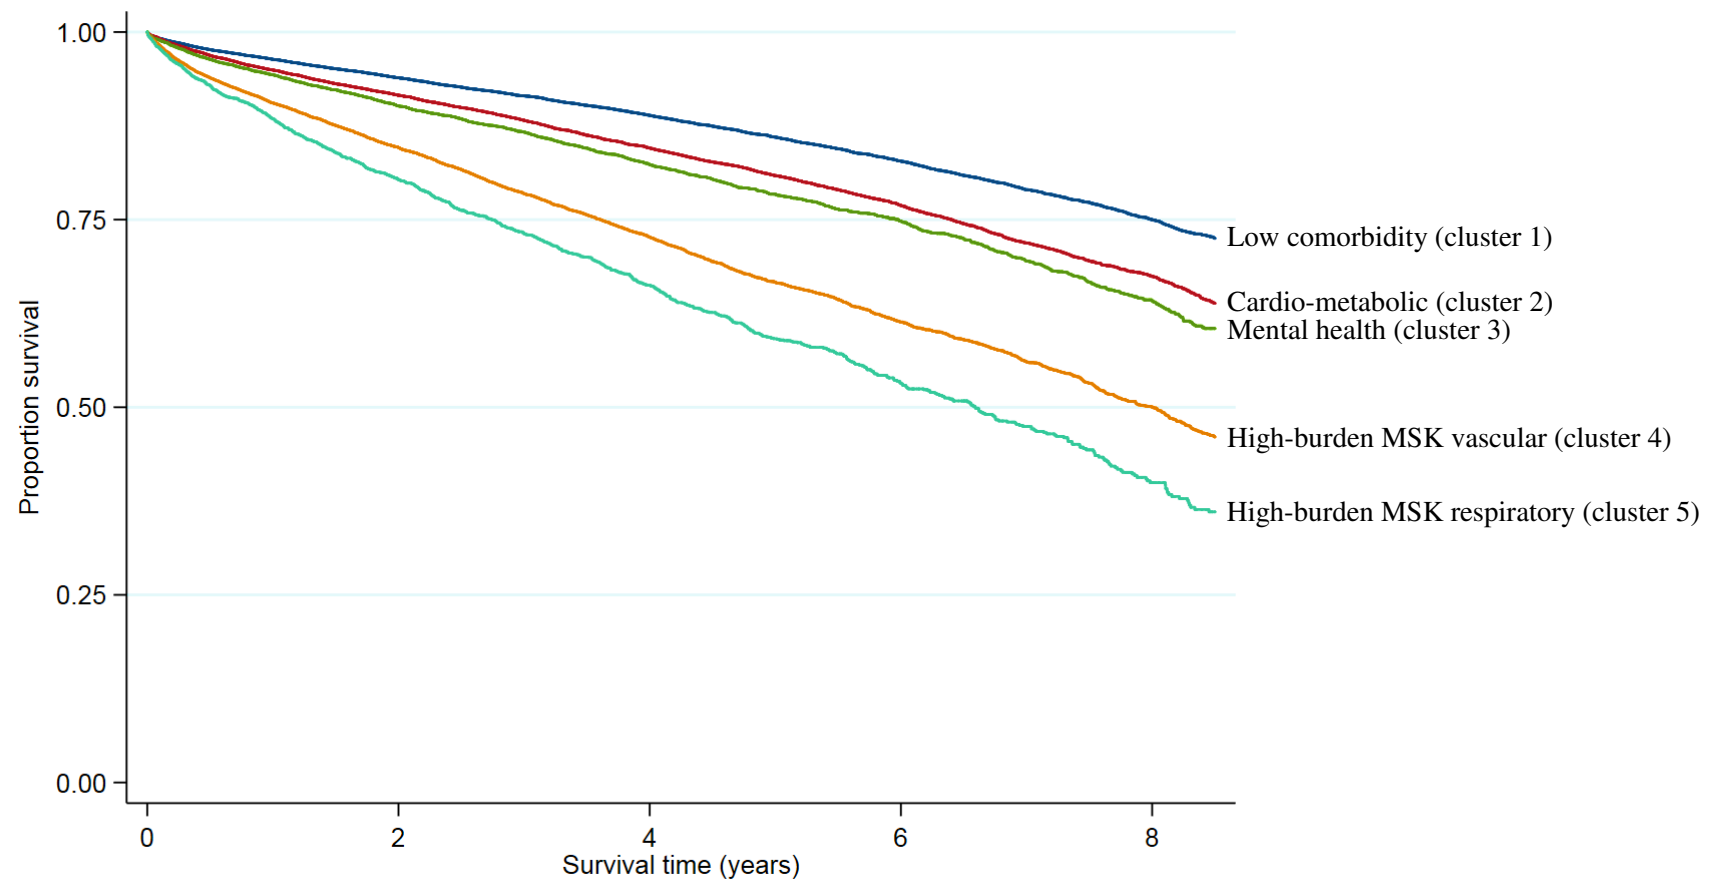**Supplementary figure 3**

Long-term survival for the five comorbidity phenotypes. Adjusted Kaplan-Meier curves according to clusters of comorbidities where expected survival is set for those age 70 years.

**Supplementary table 5**

Hazards ratio of mortality by the presence of individual comorbidities

| <b>Comorbidity</b>    | <b>Median (IQR) comorbidities</b> | <b>n</b> | <b>Deaths (%)</b> | <b>HR (95% CI) mortality</b> | <b>P value</b> |
|-----------------------|-----------------------------------|----------|-------------------|------------------------------|----------------|
| Atrial fibrillation   | 4 (3 to 5)                        | 8,115    | 3,041 (37%)       | 1.55 (1.49 to 1.62)          | < 0.001        |
| Heart failure         | 4 (3 to 5)                        | 6,379    | 2,805 (44%)       | 1.91 (1.82 to 2.00)          | < 0.001        |
| Hypertension          | 3 (2 to 4)                        | 43,413   | 10,291 (24%)      | 1.18 (1.14 to 1.22)          | < 0.001        |
| PVD                   | 4 (3 to 5)                        | 4,366    | 1,698 (39%)       | 1.64 (1.56 to 1.74)          | < 0.001        |
| Stroke & TIA          | 4 (3 to 5)                        | 7,771    | 2,823 (36%)       | 1.53 (1.46 to 1.59)          | < 0.001        |
| Kidney disease        | 4 (3 to 5)                        | 18,953   | 6,881 (36%)       | 1.38 (1.34 to 1.43)          | < 0.001        |
| Diabetes              | 3 (2 to 5)                        | 14,508   | 3,706 (26%)       | 1.68 (1.62 to 1.75)          | < 0.001        |
| Hypothyroidism        | 4 (3 to 5)                        | 7,167    | 1,619 (23%)       | 0.97 (0.93 to 1.02)          | 0.318          |
| Osteoporosis          | 4 (2 to 5)                        | 12,461   | 3,524 (28%)       | 1.31 (1.26 to 1.36)          | < 0.001        |
| Osteoarthritis        | 3 (2 to 5)                        | 22,378   | 5,377 (24%)       | 0.94 (0.91 to 0.97)          | < 0.001        |
| Rheumatoid arthritis  | 4 (3 to 5)                        | 1,834    | 584 (32%)         | 1.72 (1.57 to 1.88)          | < 0.001        |
| Dementia              | 4 (3 to 6)                        | 1,206    | 643 (53%)         | 2.13 (1.96 to 2.32)          | < 0.001        |
| Epilepsy              | 3 (2 to 5)                        | 1,650    | 387 (23%)         | 1.43 (1.29 to 1.59)          | < 0.001        |
| Cancer                | 3 (2 to 5)                        | 7,265    | 2,547 (35%)       | 1.64 (1.57 to 1.72)          | < 0.001        |
| Asthma                | 3 (2 to 5)                        | 9,581    | 2,008 (21%)       | 1.19 (1.14 to 1.25)          | < 0.001        |
| COPD                  | 4 (3 to 5)                        | 6,719    | 2,626 (39%)       | 1.88 (1.80 to 1.97)          | < 0.001        |
| Anxiety               | 3 (2 to 5)                        | 15,346   | 2,648 (17%)       | 1.08 (1.04 to 1.13)          | < 0.001        |
| Depression            | 3 (2 to 5)                        | 17,939   | 3,233 (18%)       | 1.20 (1.15 to 1.25)          | < 0.001        |
| Severe mental illness | 4 (3 to 5)                        | 1,290    | 324 (25%)         | 1.68 (1.49 to 1.90)          | < 0.001        |
| Chronic liver disease | 4 (2 to 5)                        | 1,033    | 224 (22%)         | 1.91 (1.65 to 2.20)          | < 0.001        |

COPD, chronic obstructive pulmonary disease; PVD, peripheral vascular disease; TIA, transient ischaemic attack.

\* Adjusted for age, sex, socioeconomic group, BMI, and smoking.

**Supplementary table 6**

Hazards ratio (95% CI) of mortality according to five comorbidity phenotypes at the time of ischaemic heart disease in sensitivity analysis

|                                                        | <b>Low</b> | <b>Cardio-metabolic</b> | <b>Mental health</b> | <b>High-burden<br/>musculoskeletal<br/>vascular</b> | <b>High-burden<br/>musculoskeletal<br/>respiratory</b> |
|--------------------------------------------------------|------------|-------------------------|----------------------|-----------------------------------------------------|--------------------------------------------------------|
| <b>Overall</b>                                         |            |                         |                      |                                                     |                                                        |
| Deaths                                                 | 5,277      | 4,236                   | 1,748                | 5,246                                               | 1,138                                                  |
| <i>n</i>                                               | 47,413     | 18,876                  | 10,986               | 12,049                                              | 2,862                                                  |
| HR mortality (95% CI)*                                 | 1.00 (ref) | 1.46 (1.39 to 1.52)     | 1.55 (1.46 to 1.64)  | 2.38 (2.28 to 2.49)                                 | 2.62 (2.45 to 2.79)                                    |
| <b>Among patients with complete data on covariates</b> |            |                         |                      |                                                     |                                                        |
| Deaths                                                 | 3,969      | 3,545                   | 1,466                | 4,230                                               | 970                                                    |
| <i>n</i>                                               | 37,778     | 16,289                  | 9,583                | 10,082                                              | 2,502                                                  |
| HR mortality (95% CI)*                                 | 1.00 (ref) | 1.51 (1.44 to 1.59)     | 1.54 (1.45 to 1.64)  | 2.48 (2.36 to 2.60)                                 | 2.65 (2.47 to 2.85)                                    |
| <b>Among patients with a diagnosis of MI</b>           |            |                         |                      |                                                     |                                                        |
| Deaths                                                 | 2,796      | 2,247                   | 909                  | 2,957                                               | 639                                                    |
| <i>n</i>                                               | 21,385     | 7,456                   | 4,467                | 5,757                                               | 1,373                                                  |
| HR mortality (95% CI)*                                 | 1.00 (ref) | 1.60 (1.51 to 1.70)     | 1.63 (1.52 to 1.75)  | 2.45 (2.31 to 2.59)                                 | 2.68 (2.45 to 2.92)                                    |

\* Adjusted for age, sex, socioeconomic group, BMI, and smoking.
